# Supplementary material
Source: HighWire-hosted journal article supplement (https://cmaj.ca/highwire/filestream/80867/field_highwire_adjunct_files/0/210352-image-1-at.pdf)
Supplement: 210352-image-1-at.pdf [file 210352-image-1-at.pdf]

## Appendix 1

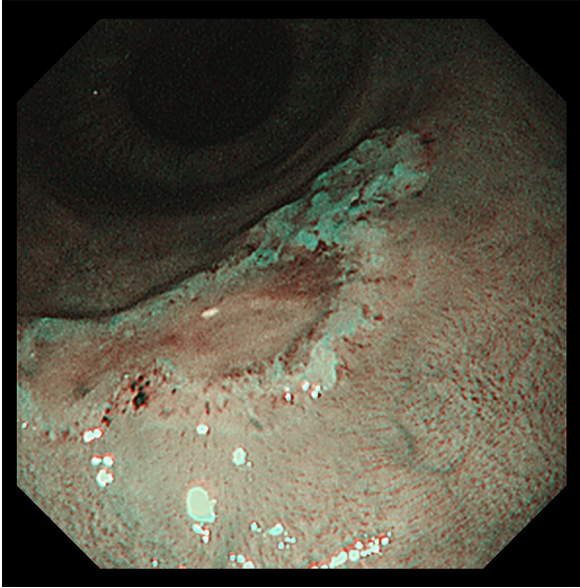

### **Caption.**

**Appendix 1.** Narrow-band imaging endoscopy showing volcano-like ulcers, a characteristic finding of herpetic esophagitis, in the distal esophagus.
